1 ***Life history of Dactylopius opuntiae (Hemiptera: Dactylopiidae) on***  
2 ***Moroccan resistant cactus germplasm***

3

4 ***SHORT TITLE: Characterization of resistance of cactus genotypes to***  
5 ***Dactylopius opuntiae***

6

7 **Mohamed El Aalaoui,<sup>1\*</sup> and Mohamed Sbaghi<sup>1</sup>**

8

9 <sup>1</sup>National Institute of Agricultural Research, Ennasr Rabat, Morocco BP 415 RP Rabat, Morocco

10

11 \*Corresponding author. Email: [mohamedelaalaoui@gmail.com](mailto:mohamedelaalaoui@gmail.com).

12

13 These authors contributed equally to this work.

14

15

16

17

18

19

20

21

22 **Abstract**

23 The important damages caused by *Dactylopius opuntiae* (Hemiptera: Dactylopiidae) to cactus crops  
24 around the world require an integrated pest management (IPM) approach, based on the combination  
25 of several techniques (varietal resistance, biological, chemical methods, etc). In this sense, this study  
26 evaluated the resistance of 10 Moroccan cactus genotypes to *D. opuntiae* in order to characterize the  
27 expression of antixenosis and/or antibiosis. Antixenosis was assessed in the greenhouse and in the  
28 laboratory (26± 2°C) using choice and non-choice tests with 1<sup>st</sup> instar nymphs. Aakria and Cherratia  
29 showed a strong antixenosis effect towards *D. opuntiae* (0-0.3 *D. opuntiae* alive 30 after infestation).  
30 For antibiosis assessment, 30 1<sup>st</sup> instar nymphs were confined on cladodes of the 10 selected  
31 genotypes under the same laboratory conditions to allow their development, as well as the life cycle  
32 performance and behavior of *D. opuntiae* on the 10 selected cactus genotypes, were evaluated under  
33 greenhouse conditions. No influence of genotypes on insect oviposition was observed, indicating that  
34 the mealybug does not prefer any genotypes over the others for oviposition. The mealybug failed to  
35 develop on genotypes Aakria and Cherratia and did not grow beyond the young female stage on all  
36 other resistant genotypes tested. Similarly, first instar nymphs fed on genotypes Marjana, Melk Zhar,  
37 and A200 died without reaching the second instar nymph stage. In addition, all genotypes tested had  
38 a negative effect on nymph viability (<24%), indicating resistance (antibiosis and/or antixenosis) to  
39 the cactus scale. These cactus genotypes may all be useful in breeding programs focused on cactus  
40 resistance to mealybugs.

41 **Keywords:** Cactus, *Dactylopius opuntiae*, Resistance, Antixenosis, Antibiosis

42

43

44

## 45 **Introduction**

46 Worldwide, approximately 130 genera and 2,000 species belonging to the family Cactaceae (order  
47 Caryophyllales) have been recorded, almost all of which are native to the Americas. Mexico is where  
48 the center of diversity for cacti in the world is based [1, 2]. Cacti occur in a wide variety of sizes and  
49 shapes, from the smallest species measuring 9 mm in diameter to the largest measuring nearly 20 m  
50 [3]. Cactaceae generally have a diploid chromosome system of  $2n = 22$ , but many species in the  
51 family Opuntioideae are known to be polyploid [3].

52 The cactus is well known as a multipurpose crop with an important ecological and economic role.  
53 Indeed, cacti can be used as fodder, medicinal plants, for human consumption (vegetables and fruits),  
54 and as ornamental plants [4]. It can also be used as a food additive, nutritional supplement, and for  
55 cosmetic and pharmaceutical purposes [4]. The cactus is grown commercially as a fruit plant in only  
56 five countries: Chile, Mexico, Italy, the United States, and South Africa [5]. Cactus fruits are very  
57 nutritious. They are rich in vitamins, minerals, proteins, phenolic compounds, and other elements  
58 with high nutritional value [6, 7]. This crop is known as a good indicator of harmfulness (Nobel,  
59 1994) and as a living fence to protect agricultural areas [8]. However, this crop is subject to a number  
60 of biotic constraints such as fungal diseases, lepidopterans, gastropods, cactus mealybugs (*Diaspis*  
61 *echinocacti* and *Dactylopius opuntiae*) that have very dangerous impacts on the yield and the  
62 sustainability of cactus cultivation even around the world. Indeed, *D. opuntiae* (Cockerell) is one of  
63 the eleven species belonging to the monogenic family Dactylopiidae [9], considered among the main  
64 pests of *Opuntia ficus-indica* (L.) Miller (Caryophyllales: Cactaceae) and other cultivated and wild  
65 *Opuntia* species in many countries in the world [10, 11, 12]. The mealybug (*D. opuntiae*) has also  
66 been known as a biological agent for the control of *Opuntia* in countries where they behave as  
67 invasive plants [13]. *Dactylopius opuntiae* is a sap-sucking insect that can have a strong negative  
68 impact on both prickly pear production for fresh consumption and cladodes used as fodder for  
69 livestock [14]. The mealybug tends to form colonies of variable size on cladodes, which in some

70 cases are completely covered by the insect [15, 16], which triggers the desiccation and loss of  
71 cladodes, premature drop of fruits and total death of the cactus plant [17]. Thus, the severe damage  
72 caused by this insect requires an integrated pest management (IPM) approach, based on the  
73 combination of several techniques, including genetic, mechanical, physical, biological, chemical, etc.  
74 methods [18, 19, 20], in order to obtain better results in the control of this pest.

75 For Morocco, the prickly pear has been introduced since the 16th century [21]. The cactus is very  
76 common in most regions of the country where the crop has become important. But unfortunately  
77 with the appearance for the first time in Morocco of the wild mealybug of cactus "*Dactylopius*  
78 *opuntiae*" in 2014, the cactus sector found itself in front of a very big scourge. The rapid and  
79 unpredictable spread of this mealybug from the first outbreak to other cactus production areas of the  
80 country has led to the destruction of several hedgerows and cactus plantations where the mealybug  
81 has devastated thousands of hectares and kilometers of cactus plantations, causing huge socio-  
82 economic and environmental losses. Similar cases were reported by Lopes et al. in 2009 where *D.*  
83 *opuntiae* attacks on a cactus forage species, *Opuntiae ficus indica*, in Brazil, resulted in the loss of  
84 100,000 ha, valued at 25 million dollars [22].

85 Considering the urgency of the mealybug, and to avoid the spread of this epidemic, the Ministry of  
86 Agriculture, Maritime Fishing, Rural Development, and Water and Forests-Morocco, put in place a  
87 major emergency plan for the control of this mealybug in 2016. This plan also included a research  
88 program covering the most important management elements such as host plant resistance [23],  
89 pesticides, beneficial insects [24, 25, 26, 27, 28], and biopesticides [29]. Of all the investigated  
90 research pathways, the identification of ten mealybug-resistant genotypes is the part that offers great  
91 hope for the revival of the cactus industry at the present time [23]. Resistant genotypes are showing  
92 positive results in Brazil as well. Matos et al. (2021) reported that the best alternative for the  
93 cultivation of cactus in regions attacked by this insect is to plant cultivars resistant to the carmine  
94 scale [30]. Thus, to provide effectively and simultaneously environmentally and human-friendly

95 alternatives, the use of resistant genotypes can be a valuable strategy for integrated pest management  
96 (IPM) [31].

97 Identifying and characterizing the defense mechanisms of the resistant cactus would be useful to  
98 researchers, as it would allow the development of molecular markers that could be used for targeted  
99 selection. However, resistance can be a complex phenomenon. Painter (1951) describes three  
100 categories of resistance: tolerance, non-preference (or antixenosis), and antibiosis [32]. In plant  
101 tolerance, the insect attacks the plant, but the plant has the ability to recover from the wound, and the  
102 insect's biological performance is not altered and its behavior is not negatively affected [33].  
103 Antixenosis describes the category of plant defense where plants have chemical or physical  
104 characteristics that make it less probable that an herbivore will use this plant as a host [32, 34].  
105 Insects use olfactory, gustatory, tactile, and visual cues to make host selection decisions, and anti-  
106 xenotic properties have been described in numerous studies of insect-plant systems for all of these  
107 cues, most of which have been described in agricultural systems [31]. Antibiosis can be defined as  
108 the category of plant resistance in which plants employ mechanisms that deleteriously affect  
109 herbivores once they have chosen to feed on this plant [32, 35]. Plants use a variety of antibiosis  
110 mechanisms, including toxic secondary metabolites such as chemicals, proteins, mechanical  
111 defenses, or combinations of these [36]. The antibiotic effects of these mechanisms can range from  
112 mild to lethal and even if an individual survives, they may suffer crippling effects such as reduction  
113 in body size, fecundity, and prolonged developmental periods [31]. In addition, induced responses  
114 are critical components of antibiosis, where certain cues such as herbivore feeding, salivary enzymes,  
115 and plant hormones cause the expression of certain defenses [31, 37].

116 Considering the enormous damage caused by this very devastating pest to cacti in Morocco and  
117 worldwide and considering that this plague continues its progression in different cactus production  
118 areas of the country and also the need to identify more sustainable control methods, the present study

119 aimed to characterize the resistance of the 10 cactus genotypes identified as resistant to *D. opuntiae*  
120 in Morocco using antixenosis and antibiosis tests in laboratory and greenhouse.

## 121 **Material and Methods**

### 122 **Site of study and plant material**

123 The study was conducted at the Agricultural Technical Institute of Khmiss Zemamra-Doukkala  
124 (2020-2021). The Doukkala region extends between latitudes 32°15 and 33°15 North and longitudes  
125 7°55 and 9°15 West. It straddles the provinces of El Jadida and Safi. It is limited to the northeast by  
126 the Chaouia, southwest by the region of Abda, west by the Atlantic Ocean, and southeast by the  
127 massifs of R'hamna. The locality of Zemamra is located in a semi-arid ecological zone where annual  
128 rainfall varies between 112.6 mm and 607 mm. The annual average of 30 years is 330 mm. The  
129 temperature varies from -1 °C to 45 °C.

130 The ten cactus genotypes tested in this study were brought collected from an INRA (National  
131 Institute for Agricultural Research) national cactus collection. Eight of these resistant genotypes  
132 (Karama, Ghalia, Belara, Marjana, Melk Zhar, Cherratia, Angad, and Aakria) have been identified as  
133 resistant to *D. opuntiae* and are already registered in the Catalogue Officiel of Cactus in Morocco  
134 [23] (Table 1).

135

136

137

138

139

140

141 **Table 1** List of cactus genotypes resistant to *D. opuntiae* and registered in the catalog officiel of  
 142 cactus in Morocco [23]

| Genotypes | Origin                                  | Characteristics of cladodes                                                         | Fruit characteristics                                                                                         |
|-----------|-----------------------------------------|-------------------------------------------------------------------------------------|---------------------------------------------------------------------------------------------------------------|
| Marjana   | Dchira- Inezgane - Morocco              | Intermec cladodes (without spines) for use as fodder                                | Fruit with light purple flesh, juicy and very sweet                                                           |
| Belara    | Dchira - Inezgane - Morocco             | Intermec cladodes (without thorns) with good forage quality                         | Fruit with white flesh, juicy and very sweet                                                                  |
| Karama    | Dchira - Inezgane - Morocco             | Spiny cladodes with very good forage quality                                        | Fruit with red flesh, very sweet and tasty                                                                    |
| Ghalia    | Dchira - Inezgane - Morocco             | Thorny cladodes of good quality and very rich in nitrogen for livestock             | Fruit with very good organoleptic quality, rich in vitamins and antioxidants, low in acidity, and very sweet  |
| Angad     | Oujda - Morocco                         | Very thorny cladodes with good quality and very rich in nitrogen for livestock      | Fruit with dark-purple flesh, sweet, tasty, and very rich in vitamin C and antioxidants                       |
| Aakria    | Bouknadel - Morocco                     | Thorny cladodes with good forage quality                                            | Red fruit of small size, too acidulous, not very sweet, and appreciated in the off-season by diabetics mainly |
| Melk Zhar | Irradiation <i>O. robusta</i> - Morocco | Very thorny cladodes with good quality and very high nitrogen content for livestock | Fruit with very good organoleptic quality, rich in vitamins and antioxidants, low in acidity                  |
| Cherratia | Bouznika-Morocco                        | Very thorny cladodes with good quality and very rich in nitrogen for livestock      | Fruit with very good organoleptic quality, low acidity, rich in vitamins and antioxidants, and very sweet     |

143

144 **The cactus mealybug colony**

145 A strain colony of *D. opuntiae* was started with infested cladodes of *Opuntia ficus-indica* (L. )  
 146 Miller, 1768) collected from fields in the locality of Zemamra (32°37'48" N, 8°42'0" W) in the

147 Casablanca-Settat region, Morocco and maintained under laboratory conditions ( $26 \pm 2^\circ\text{C}$ ,  $60 \pm 10\%$   
148 RH, and 12h photophase), using a modified version of the method described by Aldama-Aguilera  
149 and Llanderal-Cazares (2003) [38]. Infested cladodes were placed in entomological cages ( $80 \times$   
150  $80 \times 80$  cm) consisting of a wooden frame covered with mesh fabric to allow ventilation. Each  
151 cladode was punctured at the basal end by a wooden stake, left to heal for 24 hours under laboratory  
152 conditions ( $26 \pm 2^\circ\text{C}$ ,  $60 \pm 10\%$  RH), and then suspended vertically from metal grids; other uninfested  
153 cladodes collected from the same site (Zemamra) were placed horizontally beneath for nymphs that  
154 had detached on the vertical cladodes. Healthy, uninfested cladodes were introduced weekly into the  
155 cages to maintain the colony. Portions of cotton moistened with distilled water were placed in the  
156 bottoms of inverted Petri dishes (14.5 cm diameter) and introduced into the cages to maintain  
157 humidity. In order to increase the insect numbers and monitor its age, the first instar nymphs of *D.*  
158 *opuntiae* (24 hours old) were transferred to another cage with the same characteristics as described  
159 above to complete their development.

## 160 **Antixenosis test**

### 161 **Under laboratory**

162 Under laboratory conditions at  $26 \pm 2^\circ\text{C}$ ,  $60 \pm 10\%$  RH, non-preference (antixenosis) assays were  
163 evaluated in free choice and non-choice test studies against the first nymphal stages of the scale  
164 insect. To investigate the possibility of non-preference interaction in choice tests, the ten genotypes  
165 tested cladodes (one-year-old) ( $n = 3$ ) with a susceptible control were placed and arranged in a circle  
166 in entomological cages ( $80 \times 80 \times 80$  cm) with the same characteristics as described above (Cactus  
167 mealybug colony section). Five cladodes of *Opuntia ficus-indica* (L. ) heavily infested with  
168 *D.opuntiae* were placed in the center of each cage and equidistant from the cladodes. The number of  
169 alive insects (attracted) in each cladode was recorded 1, 3, 15, 30 days after infestation using a  
170 binocular loupe (Motic). This test had 20 replicates in a completely randomized design. For the no-



171 choice tests, we followed the same procedures as for the choice tests but this time the cladodes were  
172 placed separately according to genotype in entomological cages (80× 80×80cm). Study design and  
173 replication were the same for the free-choice test. The number of insects alive was measured at 1, 3,  
174 15, and 30 days after infestation, similar to what was described for the free choice test.

### 175 **Under greenhouse**

176 To assess the preference of *D. opuntiae* among 10 cactus genotypes, we performed a multiple-choice  
177 test, using a modified version of the methodology used with *Aphys glycines* Matsumura (Hemiptera:  
178 Aphididae) [39, 40] and *Dichelops melacanthus* Dallas (Hemiptera: Pentatomidae) [41]. The  
179 resistant genotypes' with susceptible control cladodes (one-year-old) were planted in normal polarity  
180 in a plastic pot (33 cm diameter by 12 cm height), filled with a mixture of fine sand (2/3) and peat  
181 (1/3), and grown until the plants reached the stage of three to five cladodes. Then the plants were  
182 arranged in completely randomized rows (1 m between rows, with 5 cm spacing between plants)  
183 under the greenhouse. Plants were irrigated as needed. Between the lines and approximately 50 cm  
184 from each pot, an *Opuntia ficus indica* (L.) cladode that was highly infested with first and second  
185 instar nymphs of *D. opuntiae* (1-15 days) was placed. These stages were chosen because the nymphs  
186 do not fly and the plots used had no cover on top. The ten genotypes were evaluated using a  
187 completely randomized design with twenty replicates. The number and stage of insects per plant  
188 were recorded at 1, 3, 15, and 30 days after infestation with help of a handloup. The semi-field daily  
189 temperature ranged 8-30 °C during this study and was recorded using thermograms, based on 6  
190 measurements made with intervals of 2 h. The night temperature was determined from the 3 lowest  
191 daily values.

192

193

194

195

196 **Antibiosis Test**

197 **Under laboratory**

198 The test was performed with cladodes of similar age and under the same laboratory conditions used  
199 in the previous test. However, in this study, cladodes of different genotypes were placed individually  
200 inside entomological cages (80× 80×80cm) (similar to those described previously) and each cladode  
201 was infested with 2 mature females of *D.opuntiae* (egg production stage). All cladodes were infested  
202 with mature females of similar age and weight. After infestation, the total number of eggs laid on  
203 each cladode was recorded. Eggs were placed in labeled Petri dishes (14.5 cm diameter ) and  
204 observed daily and the date of hatching was recorded to determine the incubation period.  
205 Hatchability (%) was calculated using the equation from Abbas et al. (2012): Hatchability = All  
206 neonates/All eggs [42]. After hatching, 30 first instar nymphs were left on each cladode and allowed  
207 to develop. First instar nymph viability (i.e., successful development to second instar nymph) and  
208 duration of each stage reached was recorded. The morphology of the different life cycle stages  
209 developed on each genotype and the behavior of the insects were examined using a binocular loupe  
210 (Motic) (results no-showed in this manuscript). The mealybug stages reached on each genotype  
211 weight (mg) was measured using an electronic balance with a precision of 0.001 mg (OHAUS  
212 CORPORATION, USA). In this experiment, each cladode represented a replicate, with 20 replicates  
213 per genotype, in a completely randomized design.

214 **Under greenhouse**

215 The life cycle performance and behavior of *D. opuntiae* on 10 selected cactus genotypes were  
216 evaluated in a greenhouse under the same temperature conditions as for the Antixenosis test (8-30  
217 °C). The ten genotypes with a susceptible control were evaluated in a completely randomized design  
218 with 20 replicates. Cactus plants offered to the mealybug were in the 3-5 cladodes stage.

219 The genotypes tested cladodes (one-year-old) were planted in plastic pots (similar in volume to those  
220 used in the antixenosis test), filled with the same substrate as described above. Cactus plants were  
221 infested with *Opuntiae ficus indica* (L.) cladodes heavily infested with *D. opuntiae* 1st instar nymphs  
222 and placed close to the axis of each plant to allow for movement and attachment of nymphs to  
223 appropriate zones on the plant. The poles were evaluated daily to assess the duration of each stage  
224 reached.

## 225 **Morphological characterization of plants**

226 Spine and cladode measurements are important informative characters for the taxonomy of *Opuntia*  
227 species [43]. Therefore, the methodological parameters used in this study were adapted from similar  
228 methods in previous work on *Opuntia* morphology by Mosco (2009), Peharec et al. (2010), and  
229 Musengi et al. (2021) [43, 44, 45]. The parameters measured were: total number of spines per  
230 cladode, cladode surface area, number of areoles per cladode, and number of areoles per plant.

231

## 232 **Statistical analyses**

233 The normality of the Antixenosis and Antibiosis assays data were evaluated using the Shapiro-Wilk  
234 W test. One-way analysis of variance (ANOVA) was used for the analysis of the number of insects  
235 attracted to the different cactus genotypes, insect development, and nymphal viability trials to  
236 compare the development of *D. opuntiae* among the host plants under laboratory and greenhouse  
237 conditions with regard to the duration of instars and mortality rates. These data were examined using  
238 analysis of variance, and means were compared with Tukey's LSD test ( $\alpha = 0.05$ ).

## 239 **Results**

### 240 **Antixenosis test**

#### 241 **Under laboratory**

242 Significant differences were observed among cactus genotypes in the four periods of attractiveness  
 243 assessment with *D.opuntiae* nymphs (Table 2). Generally for the two tests performed (free choice  
 244 and non-choice), At 1, 3, and 15 days after infestation, the genotype Aakria was the least attractive.  
 245 However, at 30 days after release, no differences were observed among the resistant genotypes  
 246 tested, and the control genotype (405-424 nymphs) was the most infested.

247 **Table 2** Mean ( $\pm$ SE) number of *Dactylopius opuntiae* on cactus genotypes in different periods in an  
 248 antixenosis experiment under laboratory conditions ( $26\pm 2^{\circ}\text{C}$ ,  $60\pm 10\%$  RH, and 12h photophase)  
 249

| Genotypes  | Number of attracted insects in free-choice test <sup>a</sup> |                                                 |                                                 |                                           | Number of attracted insects in no-choice test <sup>a</sup> |                                                 |                                                 |                                                 |
|------------|--------------------------------------------------------------|-------------------------------------------------|-------------------------------------------------|-------------------------------------------|------------------------------------------------------------|-------------------------------------------------|-------------------------------------------------|-------------------------------------------------|
|            | 1 d                                                          | 3 d                                             | 15 d                                            | 30 d                                      | 1 d                                                        | 3 d                                             | 15 d                                            | 30 d                                            |
| Aakria     | 5.9<br>$\pm 1.1$ e                                           | 2.8<br>$\pm 1.1$ e                              | 2.3<br>$\pm 0.6$ c                              | 0.0<br>$\pm 0.0$ b                        | 7.0<br>$\pm 1.2$ f                                         | 4.0<br>$\pm 1.1$ e                              | 2.8<br>$\pm 0.8$ d                              | 0.3<br>$\pm 0.4$ b                              |
| Cherratia  | 15.7<br>$\pm 1.5$ d                                          | 10.8<br>$\pm 1.5$ de                            | 9.6<br>$\pm 1.2$ bc                             | 0.2<br>$\pm 0.4$ b                        | 28.1<br>$\pm 3.8$ e                                        | 21.4<br>$\pm 1.6$ d                             | 12.9<br>$\pm 2.9$ c                             | 0.3<br>$\pm 0.5$ b                              |
| Marjana    | 16.0<br>$\pm 1.5$ d                                          | 11.6<br>$\pm 1.9$ cde                           | 9.9<br>$\pm 1.3$ bc                             | 0.3<br>$\pm 0.5$ b                        | 35.3<br>$\pm 2.6$ de                                       | 30.2<br>$\pm 2.8$ cd                            | 14.3<br>$\pm 2.4$ c                             | 0.4<br>$\pm 0.5$ b                              |
| Melk Zhar  | 26.0<br>$\pm 1.9$ c                                          | 15.8<br>$\pm 1.5$ bcd                           | 8.7<br>$\pm 1.2$ bc                             | 0.5<br>$\pm 0.6$ b                        | 44.1<br>$\pm 2.5$ cd                                       | 38.5<br>$\pm 2.4$ bc                            | 15.3<br>$\pm 2.7$ c                             | 0.4<br>$\pm 0.6$ b                              |
| Angad      | 26.9<br>$\pm 2.5$ c                                          | 16.5<br>$\pm 1.6$ bcd                           | 9.5<br>$\pm 1.9$ bc                             | 0.7<br>$\pm 0.8$ b                        | 47.3<br>$\pm 2.4$ c                                        | 40.9<br>$\pm 3.3$ bc                            | 16.8<br>$\pm 2.6$ c                             | 0.5<br>$\pm 0.6$ b                              |
| B176       | 30.4<br>$\pm 1.7$ c                                          | 21.2<br>$\pm 1.8$ bcd                           | 10.9<br>$\pm 1.6$ b                             | 0.8<br>$\pm 0.8$ b                        | 51.8<br>$\pm 2.7$ bc                                       | 41.1<br>$\pm 1.7$ bc                            | 18.9<br>$\pm 3.1$ bc                            | 0.7<br>$\pm 0.7$ b                              |
| B180       | 30.5<br>$\pm 2.0$ c                                          | 22.2<br>$\pm 1.9$ bc                            | 11.2<br>$\pm 1.8$ b                             | 0.8<br>$\pm 0.8$ b                        | 51.2<br>$\pm 2.7$ bc                                       | 41.7<br>$\pm 1.9$ bc                            | 19.8<br>$\pm 2.9$ bc                            | 0.8<br>$\pm 0.8$ b                              |
| Karama     | 32.8<br>$\pm 1.6$ bc                                         | 22.2<br>$\pm 2.4$ bc                            | 11.2<br>$\pm 1.5$ b                             | 0.9<br>$\pm 0.8$ b                        | 53.2<br>$\pm 1.7$ bc                                       | 43.1<br>$\pm 1.8$ b                             | 20.4<br>$\pm 2.7$ bc                            | 0.9<br>$\pm 0.8$ b                              |
| Ghalia     | 32.9<br>$\pm 1.5$ bc                                         | 23.3<br>$\pm 2.1$ bc                            | 11.4<br>$\pm 2.0$ b                             | 1.1<br>$\pm 0.8$ b                        | 53.1<br>$\pm 1.5$ bc                                       | 44.2<br>$\pm 2.3$ b                             | 20.7<br>$\pm 2.5$ bc                            | 1.2<br>$\pm 0.9$ b                              |
| Belara     | 39.3<br>$\pm 2.7$ b                                          | 25.5<br>$\pm 2.6$ b                             | 15.4<br>$\pm 2.3$ b                             | 1.3<br>$\pm 1.1$ b                        | 60.2<br>$\pm 2.5$ b                                        | 46.6<br>$\pm 4.2$ b                             | 26.9<br>$\pm 3.8$ b                             | 1.5<br>$\pm 0.9$ b                              |
| Control    | 176.3<br>$\pm 21.8$ a                                        | 319.6<br>$\pm 35.2$ a                           | 361.7<br>$\pm 24.4$ a                           | 405.8<br>$\pm 19.9$ a                     | 197.0<br>$\pm 34.8$ a                                      | 340.6<br>$\pm 38.3$ a                           | 374.0<br>$\pm 29.6$ a                           | 424.4<br>$\pm 32.9$ a                           |
| Statistics | $F =$<br>937.57<br>df = 10,<br>$P <$<br>0.0001               | $F =$<br>1448.45<br>df = 10,<br>$P <$<br>0.0001 | $F =$<br>3982.03<br>df = 10,<br>$P <$<br>0.0001 | $F = 8167.83$<br>df = 10,<br>$P < 0.0001$ | $F =$<br>410.79<br>df = 10,<br>$P <$<br>0.0001             | $F =$<br>1242.07<br>df = 10,<br>$P <$<br>0.0001 | $F =$<br>2688.69<br>df = 10,<br>$P <$<br>0.0001 | $F =$<br>3311.98<br>df = 10,<br>$P <$<br>0.0001 |

250

251 Means within a column followed by the same letters are not significantly different according to  
 252 Tukey's LSD test at  $\alpha = 0.05$

253 **Under greenhouse**

254 Regarding the preference of *D. opuntiae* nymphs on different cactus genotypes, at 24 h after release,  
 255 Aakria (23.2 nymphs/plant) and Cherratia (45.1 nymphs/plant) genotypes were the least infected by  
 256 *D. opuntiae* 1<sup>st</sup> instars. No differences were observed among the different cactus resistant genotypes  
 257 tested at 3, 15, and 30 days after the release of the scale pest nymphs. The susceptible control  
 258 genotype was the most infested (Table 3).

259 **Table 3** Mean ( $\pm$ SE) number of *Dactylopius opuntiae* alive on cactus genotypes in different periods  
 260 in an antixenosis experiment under semi-field conditions (i.e., choice test experiment)

| Genotypes  | Time <sup>a</sup>     |     |                       |   |                       |   |                       |   |
|------------|-----------------------|-----|-----------------------|---|-----------------------|---|-----------------------|---|
|            | 1 d                   |     | 3 d                   |   | 15 d                  |   | 30 d                  |   |
| Aakria     | 23.2 $\pm$ 4.6        | f   | 10.6 $\pm$ 3.5        | b | 6.0 $\pm$ 1.7         | b | 0.0 $\pm$ 0.0         | b |
| Cherratia  | 45.1 $\pm$ 3.9        | ef  | 30.9 $\pm$ 4.6        | b | 11.5 $\pm$ 2.5        | b | 0.3 $\pm$ 0.5         | b |
| Marjana    | 62.7 $\pm$ 5.8        | de  | 11.6 $\pm$ 1.9        | b | 11.2 $\pm$ 1.8        | b | 0.7 $\pm$ 0.8         | b |
| Melk Zhar  | 77.0 $\pm$ 6.0        | cd  | 30.5 $\pm$ 3.4        | b | 11.5 $\pm$ 1.9        | b | 0.8 $\pm$ 0.9         | b |
| Angad      | 79.0 $\pm$ 6.4        | cd  | 32.1 $\pm$ 4.0        | b | 11.9 $\pm$ 2.0        | b | 0.9 $\pm$ 1.0         | b |
| B176       | 89.4 $\pm$ 5.5        | bcd | 41.7 $\pm$ 2.5        | b | 12.1 $\pm$ 2.0        | b | 1.1 $\pm$ 1.0         | b |
| B180       | 89.8 $\pm$ 7.6        | bcd | 43.9 $\pm$ 3.7        | b | 13.0 $\pm$ 2.3        | b | 1.2 $\pm$ 1.0         | b |
| Karama     | 94.2 $\pm$ 5.2        | bc  | 41.7 $\pm$ 6.0        | b | 13.5 $\pm$ 2.0        | b | 1.4 $\pm$ 1.0         | b |
| Ghalia     | 95.5 $\pm$ 4.5        | bc  | 41.6 $\pm$ 6.5        | b | 13.7 $\pm$ 1.9        | b | 1.4 $\pm$ 1.0         | b |
| Belara     | 112.8 $\pm$ 11.0      | b   | 49.6 $\pm$ 5.4        | b | 14.2 $\pm$ 1.7        | b | 1.7 $\pm$ 0.9         | b |
| Control    | 702.2 $\pm$ 85.9      | a   | 1592.8 $\pm$ 180.0    | a | 1804.5 $\pm$ 120.9    | a | 2029.0 $\pm$ 99.6     | a |
| Statistics | $F = 1022.25$         |     | $F = 1492.85$         |   | $F = 4382.44$         |   | $F = 8283.89$         |   |
|            | df = 10, $P < 0.0001$ |     | df = 10, $P < 0.0001$ |   | df = 10, $P < 0.0001$ |   | df = 10, $P < 0.0001$ |   |

261

262 Means within a column followed by the same letters are not significantly different according to  
 263 Tukey's LSD test at  $\alpha = 0.05$

264 **Antibiosis Test**

265 **Under laboratory**

266 No significant differences were observed among genotypes on the number of eggs per cladode,  
 267 incubation period, and hatchability percentage (Table 4). The scale pest does not reach to develop  
 268 definitively on the genotypes Aakria and Cherratia, and doesn't get beyond the young female stage in

269 all the other tested resistant genotypes. For the other genotypes, the development time of *D. opuntiae*  
270 nymphs was significantly affected by different cactus genotypes in 1<sup>st</sup> and 2<sup>nd</sup> instars.

271 For 1st instars, the genotypes Marjana (37 days), and Melk Zhar (36.1 days) induced the longest  
272 development times, whereas Belara induced the shortest development time for this stage. First instar  
273 nymphs fed Marjana, Melk Zhar, and A200 dying without having completed the 2nd nymphal stage.  
274 The B176 (43.5 days), B180 (42.9 days), and Karama (42 days) genotypes extended the development  
275 time of 2<sup>nd</sup> instars, compared to Belara (37.6 days) genotype. The total nymphal development time  
276 (1st instar to young female) was significantly longer when *D. opuntiae* fed on B176 (76.6 days),  
277 B180 (75.6 days), and Karama (74.3 days) genotypes and shortest when nymphs fed on Belara (65.1  
278 days) (Table 4).

279 Weights of 2<sup>nd</sup> instars were significantly higher when the scale pests fed on Belara (5.5 mg)  
280 genotype compared to the other genotypes.

281 We recorded wide variation among genotypes in first instar nymph viability, which ranged from 0.0  
282 % to 24.4 % (Fig 1). Higher rates of survival to second instar nymph stage were observed when first  
283 instar nymphs were fed Belara plants (24.4%). On the other hand, the genotypes Aakria (0.0%) and  
284 Cherratia (0.0%) negatively affected this parameter of the mealybug.

285

286

287

288

289

290

291 **Table 4** The developmental parameters of *Dactylopius opuntiae* on cactus genotypes in an antibiosis  
 292 experiment (i.e., no-choice test) under laboratory conditions (26± 2°C, 60± 10% RH, and 12h  
 293 photophase)

| Genotypes  | Number of eggs/cladode <sup>a</sup> | Incubation period (hours) <sup>a</sup> | Hatchability (%) <sup>a</sup>    | 1 <sup>st</sup> instar duration (days) <sup>a</sup> | 2 <sup>nd</sup> instar duration (days) <sup>a</sup> | Nymphal period (1 <sup>st</sup> instar-Young female) <sup>a</sup> | 2 <sup>nd</sup> instar weight (mg) <sup>a</sup> |
|------------|-------------------------------------|----------------------------------------|----------------------------------|-----------------------------------------------------|-----------------------------------------------------|-------------------------------------------------------------------|-------------------------------------------------|
| Aakria     | 130.0±25.4 a                        | 22.2±1.5 a                             | 82.8±11.9 a                      | -                                                   | -                                                   | -                                                                 | -                                               |
| Cherratia  | 128.7±25.9 a                        | 22.3±1.7 a                             | 84.4±13.0 a                      | -                                                   | -                                                   | -                                                                 | -                                               |
| Marjana    | 129.9±25.0 a                        | 22.3±1.6 a                             | 83.0±11.1 a                      | 37.0±2.2 a                                          | -                                                   | -                                                                 | -                                               |
| Melk Zhar  | 131.9±24.7 a                        | 21.7±1.8 a                             | 82.9±10.6 a                      | 36.1±2.1 ab                                         | -                                                   | -                                                                 | -                                               |
| Angad      | 132.8±24.0 a                        | 21.8±1.8 a                             | 83.2±10.0 a                      | 34.6±1.6 bc                                         | -                                                   | -                                                                 | -                                               |
| B176       | 133.6±23.3 a                        | 22.2±2.0 a                             | 83.4±9.4 a                       | 30.1±1.8 cd                                         | 43.5±1.1 a                                          | 76.6±2.1 a                                                        | 4.2±0.4 b                                       |
| B180       | 134.5±23.0 a                        | 21.4±1.5 a                             | 84.8±9.1 a                       | 32.7±1.9 cd                                         | 42.9±1.5 ab                                         | 75.6±2.3 ab                                                       | 4.3±0.5 b                                       |
| Karama     | 136.9±20.4 a                        | 21.6±1.3 a                             | 84.7±9.8 a                       | 32.3±1.5 d                                          | 42.0±2.2 ab                                         | 74.3±2.8 ab                                                       | 4.4±0.5 b                                       |
| Ghalia     | 137.8±19.8 a                        | 21.2±1.4 a                             | 84.1±9.6 a                       | 31.9±2.5 d                                          | 41.6±2.3 b                                          | 73.5±3.9 b                                                        | 4.4±0.5 b                                       |
| Belara     | 142.8±19.4 a                        | 20.9±1.5 a                             | 83.4±11.2 a                      | 27.6±3.2 e                                          | 37.6±3.1 c                                          | 65.1±3.9 c                                                        | 5.5±0.6 a                                       |
| Statistics | $F = 0.69$<br>df = 9, $P = 0.71$    | $F = 1.91$<br>df = 9, $P = 0.05$       | $F = 0.10$<br>df = 9, $P = 1.00$ | $F = 36.29$<br>df = 7, $P < 0.0001$                 | $F = 23.64$<br>df = 4, $P < 0.0001$                 | $F = 44.08$<br>df = 4, $P < 0.0001$                               | $F = 24.41$<br>df = 4, $P < 0.0001$             |

294

295 Means within a column followed by the same letters are not significantly different according to

296 Tukey's LSD test at  $\alpha = 0.05$

297

298 **Fig 1** Nymphal viability (i.e., successful development to second instar nymph) of *D. opuntiae* on  
 299 cactus resistant genotypes, in an antibiosis experiment (i.e., no-choice test). Different letters indicate  
 300 significant difference between treatments by the Tukey's LSD test at  $\alpha = 0.05$

301

### 302 Under greenhouse

303 The results are similar in shape to those obtained in the laboratory conditions, therefore confirming

304 them. The results have shown that under greenhouse also the scale pest does not reach to develop

305 definitively on the genotypes Aakria and Cherratia and doesn't get beyond the young female stage in

306 all the other tested resistant genotypes. Also, first instar nymphs fed Marjana, Melk Zhar, and A200

307 dying without having completed the 2<sup>nd</sup> nymphal stage (Table 5). For the other genotypes tested, the

308 nymphal period ranged from 54.7 to 65.5 days on average, with the longest mean development time  
 309 on the genotypes B176, B180, and Karama and the shortest on Belara genotype (Table 5).

310 **Table 5** Mean ( $\pm$ SE) development time of *Dactylopius opuntiae* reached stage on cactus genotypes  
 311 in an antibiosis experiment under semi-field conditions (i.e., free-choice test)

| Genotypes  | 1 <sup>st</sup> instar duration (days) <sup>a</sup> | 2 <sup>nd</sup> instar duration (days) <sup>a</sup> | Nymphal period<br>(1 <sup>st</sup> instar- Young female) <sup>a</sup> |
|------------|-----------------------------------------------------|-----------------------------------------------------|-----------------------------------------------------------------------|
| Aakria     | -                                                   | -                                                   | -                                                                     |
| Cherratia  | -                                                   | -                                                   | -                                                                     |
| Marjana    | 32.1 $\pm$ 2.2 a                                    | -                                                   | -                                                                     |
| Melk Zhar  | 30.6 $\pm$ 1.8 ab                                   | -                                                   | -                                                                     |
| Angad      | 28.9 $\pm$ 1.9 bc                                   | -                                                   | -                                                                     |
| B176       | 27.8 $\pm$ 2.0 cd                                   | 37.8 $\pm$ 2.5 a                                    | 65.5 $\pm$ 3.5 a                                                      |
| B180       | 27.3 $\pm$ 2.0 cd                                   | 37.8 $\pm$ 1.8 a                                    | 65.1 $\pm$ 2.3 a                                                      |
| Karama     | 27.2 $\pm$ 1.6 cd                                   | 37.0 $\pm$ 2.3 a                                    | 64.2 $\pm$ 2.6 a                                                      |
| Ghalia     | 26.7 $\pm$ 2.6 d                                    | 36.4 $\pm$ 2.5 a                                    | 63.1 $\pm$ 4.0 a                                                      |
| Belara     | 22.2 $\pm$ 3.6 e                                    | 32.5 $\pm$ 3.0 b                                    | 54.7 $\pm$ 4.1 b                                                      |
| Statistics | $F = 33.16$<br>df = 7, $P < 0.0001$                 | $F = 16.03$<br>df = 4, $P < 0.0001$                 | $F = 35.11$<br>df = 4, $P < 0.0001$                                   |

312

313 Means within a column followed by the same letters are not significantly different according to  
 314 Tukey's LSD test at  $\alpha = 0.05$

### 315 **Morphological characterization of cactus genotypes**

316 Principal component analysis of morphological traits of spines, cladodes, and whole plants showed  
 317 clear groupings among cactus genotypes that correspond to their phylogenetic relationships. Karama  
 318 and Ghalia shared cladode thickness and number of areoles with Belara. (Cherratia, Angad), and  
 319 (Melk Zhar, Marjana), and (Aakria, B180) appeared as a distinct grouping respectively separated by  
 320 the four morphometric characters tested (Fig 2).

321 **Fig 2** A principal component analysis (PCA) using four morphometric characters (i.e. total number  
 322 of spines per cladode, cladode surface area, number of areoles per cladode, and number of areoles  
 323 per plant) for the ten cactus genotypes identified as resistant to *D.opuntiae* in Morocco (n = 5  
 324 plant/genotype). A236: Marjana; A202: Belara ; A205: Karama ; A206: Ghalia; B200: Angad; A180:  
 325 Aakria; A176: Melk Zhar; A414: Cherratia

326



327

## 328 **Discussion**

329 Among the newly introduced enemies on cactus in Morocco, there is the mealybug "*Dactylopius*  
330 *opuntiae*"; a very devastating insect that is spreading in the Mediterranean countries with  
331 catastrophic damage on the cactus crop.

332 The management of this pest in the world, and more particularly in Morocco, is based mainly on  
333 several components, namely, i) the use of treatments by insecticides that have shown their limits in  
334 the field, ii) uprooting and burying of infested plants which is heavy, expensive and sometimes  
335 difficult to apply at the level of cactus plantations in the rough terrain or as hedges around houses,  
336 and finally, iii) scientific research. This last section focused on knowledge of this new pest,  
337 investigation of alternative methods of control, and research for genetic sources of cacti resistant to  
338 the wild scale "*Dactylopius opuntiae*". Indeed, the first two axes have allowed enrichment of  
339 scientific knowledge useful for the continuation of the work related to the control of this new pest,  
340 while the third axis on the varietal resistance of cactus to the mealybug, was the relevant and saving  
341 solution. Thus, initially, the ten genotypes identified resistant by research in Morocco, will constitute  
342 a solid foundation for the launch of the national program of recovery of cactus decimated across the  
343 country by the Ministry of Agriculture, Maritime Fishing, Rural Development, and Water and  
344 Forests [23]. Our study documents the first study on the life history of *D.opuntiae* on the ten  
345 genotypes identified as resistant in Morocco using antixenosis and antibiosis tests in the laboratory  
346 and greenhouse.

347 Generally, antixenotic resistance to insects occurs due to the existence of morphological and/or  
348 chemical factors [46]. The results of this study (under laboratory and greenhouse conditions)  
349 indicated that all resistant genotypes tested showed a different level of antixenosis compared to the  
350 susceptible control and Aakria and Cherratia showed a strong antixenosis effect toward *D. opuntiae*

351 (0-0.3 *D. opuntiae* alive 30 after infestation). The mechanisms underlying antixenosis resistance in  
352 these genotypes remain unknown. However, volatile chemical compounds may have differed  
353 between genotypes, which could determine whether a genotype will be more or less infested [47]. In  
354 addition, plants have the ability to produce multiple insecticidal compounds to defend themselves  
355 [41]. A new work published by Matos et al. (2021) that compared the chemical profile of four  
356 species of forage palms in Brazil (only one of which is susceptible to *D. opuntiae* and the others  
357 resistant), reported a total of 28 metabolites of which 18 were annotated [30]. The same authors  
358 indicated that quercetin, kaempferol, and isorhamnetin derivatives are distinguished as the main  
359 components of forage palm. Quercetin rhamnosyl dihexoside, quercitrin-3-O-2',6'-  
360 dirhamnosylglucoside, and isorhamnetin-3-sophoroside 7-rhamnoside are the biomarkers that may be  
361 associated with resistance to *D. opuntiae* [30]. However, to confirm this hypothesis, additional  
362 studies should be performed.

363 No influence of cactus genotypes on insect biological parameters, including number of eggs per  
364 cladode, incubation period, and hatching percentage, was observed, indicating that the scale pest  
365 does not prefer any genotype over the others for oviposition. The mealybug fails to develop  
366 successfully on genotypes Aakria and Cherratia and does not develop beyond the young female stage  
367 in all other resistant genotypes tested. Also, first instar nymphs fed Marjana, Melk Zhar and A200  
368 died without reaching the second instar nymphal stage, in addition, all the genotypes tested  
369 prolonged nymphal development of *D. opuntiae* and adversely affected nymphal viability (<24%),  
370 indicating resistance (antibiosis and/or antixenosis) to the cactus mealybug.

371 Antixenosis and antibiosis typically overlap, meaning that genotypes with high levels of antixenotic  
372 determinants may also have deleterious effects on insect life history, causing similar effects to plants  
373 that express antibiosis [31, 32]. For this reason, it may be difficult to differentiate between the two  
374 categories of resistance [48, 49] and may require specific determination of the mechanisms involved  
375 in insect toxification and detoxification. To avoid this misconception, new tools have been

376 developed. For stink bugs, for example, electrical penetration graph (EPG) techniques have recently  
377 begun to be used to characterize feeding behavior [50, 51] and may be used in the future to  
378 characterize plant resistance categories. Second instar weights were significantly higher on the  
379 Belara genotype (5.5 mg) and no differences were observed among the other genotypes. In the  
380 present study, we observed that Belara leads to faster development of the nymphal stages of *D.*  
381 *opuntiae* compared to the other genotypes in which the insect successfully develops to the young  
382 female stage.

### 383 **Conclusion**

384 The results of this study showed that the genotypes Aakria and Cherratia were the least attractive to  
385 *D. opuntiae*, indicating the expression of a strong antixenosis effect towards the scale pest. Under  
386 multiple choice conditions, the mealybug preferred no one genotype over the others for oviposition.  
387 Under laboratory and semi-field conditions, mealybug failed to develop on the genotypes Aakria and  
388 Cherratia and did not grow beyond the young female stage on all other resistant genotypes tested. In  
389 addition, the first instar nymphs fed on genotypes Marjana, Melk Zhar, and A200 died without  
390 reaching the second instar nymphal stage. In addition, all genotypes tested prolonged nymphal  
391 development of *D. opuntiae* and negatively affected their viability (<24%), indicating resistance  
392 (antibiosis and/or antixenosis) to the cactus mealybug. Genotypes Aakria and Cherratia showed the  
393 greatest stability of resistance as they showed a high level of antibiosis and antixenosis effect.  
394 Considering the extensive damage caused by *D. opuntiae* to cactus crops worldwide, further studies  
395 are needed to better interpret the resistance factors shown by certain genotypes. This information will  
396 be useful for breeding programs focused on pest resistance, in addition to assisting in the  
397 management of *D. opuntiae* in cactus plantations.

398

399

400

401

402

## 403 References

- 404 1. Novoa A, Le Roux JJ, Robertson MP, Wilson JRU, Richardson DM. Introduced and  
405 Invasive Cactus Species: A Global Review. *AoB Plants*. 2015; 7: plu078{plu078. doi:  
406 10.1093/aobpla/plu078.
- 407 2. Van Steenderen C. A genetic analysis of the species and intraspecific lineages of  
408 *Dactylopius Costa* (Hemiptera: Dactylopiidae).2019.
- 409 3. Anderson EF The Cactus Family. Timber Press, Portland, Oregon. ISBN 978-0-88192-  
410 498-5. 2001.
- 411 4. Rodriguez-Felix A. Postharvest physiology and technology of cactus pear fruits and  
412 cactus leaves. *Acta Hortic*. 2002; 581: 191–99.
- 413 5. Mondragón-Jacobo C, Pérez-Gonzalez S. Germplasm resources and breeding *Opuntia* for  
414 fodder production. In: Mondragón-Jacobo C, Pérez-Gonzalez S (eds) *Cactus (Opuntia*  
415 *spp.) as forage*. FAO Rome. 2001; 21–28.
- 416 6. Shetty AA, Rana MK, Preetham SP. Cactus: a medicinal food. *J Food Sci Technol*. 2012;  
417 49: 530–36.
- 418 7. El Kharrassi Y, Mazri MA, Benyahia H, Benaouda H, Nasser B. Fruit and juice  
419 characteristics of 30 accessions of two cactus pear species (*Opuntia ficus indica* and  
420 *Opuntia megacantha*) from different regions of Morocco. *LWT-Food Sci Technol*. 2016;  
421 65: 610–17.
- 422 8. Nobel PS. Remarkable agaves and cacti. Oxford Univ Press, New York. 1994.
- 423 9. De Lotto G. On two genera of mealybugs (Homoptera: Coccoidea: Pseudococcidae). *J*  
424 *Entomol Soc South Afric*. 1974; 37: 109–15.
- 425 10. Spodek M, Ben-Dov Y, Protasov A, Carvalho CJ, Mendel Z. First record of *Dactylopius*  
426 *opuntiae* (Cockerell) (Hemiptera: Coccoidea: Dactylopiidae) from Israel. *Phytoparasitica*.  
427 2014; 42: 377–79.
- 428 11. Vanegas-Rico JM, Lomeli-Flores JR, Rodríguez-Leyva E, Pérez-Panduro A, Hernández-  
429 González H, Marín-Jar-amillo A. *Hyperaspis trifurcata* (Coleoptera: Coc-cinellidae) y sus  
430 parasitoides en el centro de Me´xico. *Rev Colomb Entomol*. 2015; 41: 194–99.
- 431 12. García Morales M, Denno BD, Miller DR, Miller GL, Ben-Dov Y., Hardy NB. ScaleNet:  
432 a literature-based model of scale insect biology and systematics. Database. doi:  
433 10.1093/database/bav118. 2016.
- 434 13. Volchansky CR, Hoffmann JH, Zimmermann HG. Host-plant affinities of two biotypes of  
435 *Dactylopius opuntiae* (Homoptera: Dactylopiidae): enhanced prospects for biological  
436 control of *Opuntia stricta* (Cactaceae) in South Africa. *J Appl Ecol*. 1999; 36: 85–91.

- 437 14. MacGregor LR, Sampedro RG. Catalogo de coccidos Mexicanos - Familia Dactylopiidae  
438 (Homoptera - Coccoidea). Anales Inst Biol Univ Nac Autón México Zool. 1984; 54: 217–  
439 23.
- 440 15. Mena C, Rosas JYS. Guía Para el Manejo Integral de las Plagas de Nopal Tunero.  
441 Publicación Especial no. 14, SAGARPA/INIFAP, Zacatecas, Mexico. 2004.
- 442 16. Cruz-Rodríguez JA, Gonzalez-Machorro E, Villegas Gonzalez AA, Rodríguez Ramírez  
443 ML, Mejía Lara F. Autonomous biological control of *Dactylopius opuntiae* (Hemiptera:  
444 Dactylopiidae) in a prickly pear plantation with ecological management. Environ  
445 Entomol. 2016; 45: 642–48.
- 446 17. Mann J. Cactus-feeding insects and mites. US National Museum Bullten. 1969; 256:1–  
447 158.
- 448 18. Cavalcanti VALB, Sena RC, Coutinho JLB, Arruda GP, Rodrigues FB. Controle das  
449 cochonilhas da palma forrageira. BoletimIPA Responde. 2001; 39: 1–2.
- 450 19. Vasconcelos AGVD, Lira MDA, Cavalcanti VLB, Santos MVFD, Willadino L. Seleção  
451 de clones de palma forrageira resistentes à cochonilha-do-carmim (*Dactylopius* sp). Rev  
452 Bras Zootec. 2009; 38(5): 827–31.
- 453 20. Lopes EB. Palma forrageira: cultivo, uso atual e perspectivas de utilização no semi-árido  
454 nordestino. João Pessoa: EMEPA/FAEPA. Paraíba, Brazil. 2007.
- 455 21. Arba M, BenIsmail MC, Mokhtari M. The cactus pear (*Opuntia* spp.) in Morocco: Main  
456 species and cultivar characterization. Acta Hort. 2002; 581: 103–9.
- 457 22. Lopes EB, Brito CH, Albuquerque IC, Batista JL. Desempenho do óleo de laranja no  
458 controle da cochonilha-do-carmim em palma gigante. Eng Ambient. 2009; 6 : 252–58.
- 459 23. Sbaghi M, Bouharroud R, Boujghagh M, EL Bouhssini M. Sources de résistance  
460 d'*Opuntia* spp. contre la cochenille à carmin, *Dactylopius opuntiae*, au Maroc. EPPO  
461 Bulletin. 2019; 49(3): 585–92. <https://doi.org/10.1111/epp.12606>
- 462 24. Bouharroud R, Sbaghi M, Boujghagh M, El Bouhssini M. Biological control of the prickly  
463 pear cochineal *Dactylopius opuntiae* Cockerell (Hemiptera: Dactylopiidae). EPPO  
464 Bulletin. 2018; 48: 300–6.
- 465 25. Bouharroud R, El Aalaoui M, Boujghagh M, Hilali L, El Bouhssini M, Sbaghi M. New  
466 Record and Predatory Activity of *Hyperaspis campestris* (Herbst 1783) (Coleoptera:  
467 Coccinellidae) on *Dactylopius opuntiae* (Hemiptera: Dactylopiidae) in Morocco. Entomol  
468 News. 2019; 128(2): 156–61.
- 469 26. El Aalaoui M, Bouharroud R, Sbaghi M, El Bouhssini M, Hilali L, Dari K. Comparative  
470 toxicity of different chemical and biological insecticides against the scale insect  
471 *Dactylopius opuntiae* and their side effects on the predator *Cryptolaemus*  
472 *montrouzieri*. Arch Phytopathol Plant Protect. 2019; 52 (1-2): 155–69.
- 473 27. El Aalaoui M, Bouharroud R, Sbaghi M, El Bouhssini M, Hilali L. Predatory potential of  
474 eleven morocco native adult ladybird species on different stages of *Dactylopius opuntiae*  
475 (Cockerell) (Hemiptera: Dactylopiidae), EPPO Bulletin. 2019; 49(2): 374–79.
- 476 28. El Aalaoui M, Bouharroud R, Sbaghi M, El Bouhssini M, Hilali L. First study of biology  
477 of *Cryptolaemus montrouzieri* and its potential to feed on the mealybug *Dactylopius*  
478 *opuntiae* (Hemiptera: Dactylopiidae) Morocco biotype under laboratory conditions. Arch  
479 Phytopathol Plant Protect. 2019; 52(13-14): 1112–124.

- 480 29. Ramdani C, Bouharroud R, Sbaghi M, Mesfioui A, El bouhssini M. Field and laboratory  
481 evaluations of different botanical insecticides for the control of *Dactylopius*  
482 *opuntiae* (Cockerell) on cactus pear in Morocco. *Int J Trop Insect Sci.* 2020.  
483 <https://doi.org/10.1007/s42690-020-00363-w>
- 484 30. Matos TKB, Guedes JA, Alves Filho EG, Luz LR, Lopes GS, do Nascimento RF, de  
485 Sousa JA, Canuto KM, de Brito ES, Dias-Pini NS, Zocolo GJ. Integrated UPLC-HRMS,  
486 Chemometric Tools, and Metabolomic Analysis of Forage Palm (*Opuntia* spp. and  
487 *Nopalea* spp.) to Define Biomarkers Associated with Non-Susceptibility to Carmine  
488 Cochineal (*Dactylopius opuntiae*). 2021. [https://dx.doi.org/10.21577/0103-](https://dx.doi.org/10.21577/0103-5053.20210060)  
489 [5053.20210060](https://dx.doi.org/10.21577/0103-5053.20210060)
- 490 31. Smith CM. Plant resistance to arthropods. Springer, Dordrecht. 2005.
- 491 32. Painter RH. Insect resistance in crop plant. Macmillan, New York. 1951; 72(6): 481.
- 492 33. Lara FM. Princípios de resistência de plantas a insetos. São Paulo, Ícone. 1991; 336.
- 493 34. Kogan M, Ortman EF. Antixenosis— a new term proposed to define Painter’s  
494 “nonpreference” modality of resistance. *Bulletin of the ESA.* 1978; 24: 175–76.
- 495 35. Wise MJ, Partelow JM, Everson KJ, Anselmo MK, Abrahamson WG. Good mothers, bad  
496 mothers, and the nature of resistance to herbivory in *Solidago altissima*. *Oecologia.* 2008;  
497 155: 257–66.
- 498 36. War AR, Paulraj MG, Ahmad T, Buhroo AA, Hussain B, Ignacimuthu S, Sharma HC.  
499 Mechanisms of plant defense against insect herbivores. *Plant Signal & Behav.* 2012; 7:  
500 1306–320.
- 501 37. Ali JG, Agrawal AA. Specialist versus generalist insect herbivores and plant defense.  
502 *Trends Plant Sci.* 2012; 17: 293–302.
- 503 38. Aldama-Aguilera C, Llanderal-Cázares C. Cochineal: comparison of production methods  
504 in cut cladodes. *Agrociencia.* 2003; 37: 11–19.
- 505 39. Diaz-Montano J, Reese JC, Schapaugh WT, Campbell LR. Characterization of antibiosis  
506 and antixenosis to the soybean aphid (Hemiptera: Aphididae) in several soybean  
507 genotypes. *J Econ Entomol.* 2006; 99: 1884–89.
- 508 40. Baldin ELL, Marchi-Werle L, Pannuti LER, Lourenção AL, Heng- Moss TM, Hunt TE.  
509 Evaluating categories of resistance in soybean genotypes from the United States and  
510 Brazil to *Aphis glycines* (Hemiptera: Aphididae). *Fla Entomol.* 2016; 99: 487–95.
- 511 41. Bueno NM, Baldin ELL, Canassa VF, do Prado Ribeiro L, da Silva IF, Lourencao AL,  
512 Koch RL. Characterization of antixenosis and antibiosis of corn genotypes to *Dichelops*  
513 *melacanthus* Dallas (Hemiptera: Pentatomidae). *Gesunde Pflanzen.* 2021; 73(1): 67–76.
- 514 42. Abbas N, Shad SA, Razaq M. Fitness cost, cross resistance and realized heritability of  
515 resistance to imidacloprid in *Spodoptera litura* (Lepidoptera: Noctuidae). *Pestic Biochem*  
516 *Phys.* 2012; 103: 181–88.
- 517 43. Mosco A. Micro-morphology and anatomy of *Turbinicarpus* (Cactaceae) spines. *Rev Mex*  
518 *Biodivers.* 2009; 80(1): 119–28.
- 519 44. Peharec P, Posilović H, Balen B, Krsnik-Rasol M. Spine micromorphology of normal and  
520 hyperhydric *Mammillaria gracilis* Pfeiff. (Cactaceae) shoots. *J Microsc.* 2010; 239(1):  
521 78–86.



- 522 45. Musengi K, Mbonani S, Byrne MJ. Host suitability of three *Opuntia* taxa for the  
523 *Dactylopius opuntiae* (Hemiptera: Dactylopiidae) 'stricta' lineage. *Biocontrol Sci Technol.*  
524 2021; 1–13. <https://doi.org/10.1080/09583157.2021.1932747>
- 525 46. Panda N, Khush GS. *Host Plant Resistance to Insects.* CAB Int., Wallingford, UK.  
526 1995.
- 527 47. Bernays, E. A., and R. E. Chapman. "Behavior: the process of host-plant selection." *Host-*  
528 *plant selection by phytophagous insects.* 1994; 95–165.
- 529 48. Baldin ELL, Schlick-Souza EC, Lourenção AL, Camargo RS. Resistance of collard  
530 greens to *Ascia monuste orseis* (Lepidoptera: Pieridae). *Arthropod Plant Interact.* 2014; 9:  
531 67–74.
- 532 49. Morando R, Baldin ELL, Cruz PL, Lourenção AL. Assessing common bean cultivars for  
533 resistance to the soybean looper *Chrysodeixis includens* (Lepidoptera: Noctuidae).  
534 *Neotrop Entomol.* 2017; 46: 561–70.
- 535 50. Lucini T, Panizzi AR. Electropenetrography (EPG): a breakthrough tool unveiling stink  
536 bug (Pentatomidae) feeding on plants. *Neotrop Entomol.* 2017; 47: 6–18.
- 537 51. Panizzi AR, Lucini T (2018) Body position of the stink bug *Dichelops melacanthus*  
538 (Dallas) during feeding from stems of maize seedlings. *Braz J Biol.* 2018; 79: 304–10.

539

540

541

542

543

bioRxiv preprint doi: <https://doi.org/10.1101/2021.07.23.453565>; this version posted July 23, 2021. The copyright holder for this preprint (which was not certified by peer review) is the author/funder, who has granted bioRxiv a license to display the preprint in perpetuity. It is made available under aCC-BY 4.0 International license.

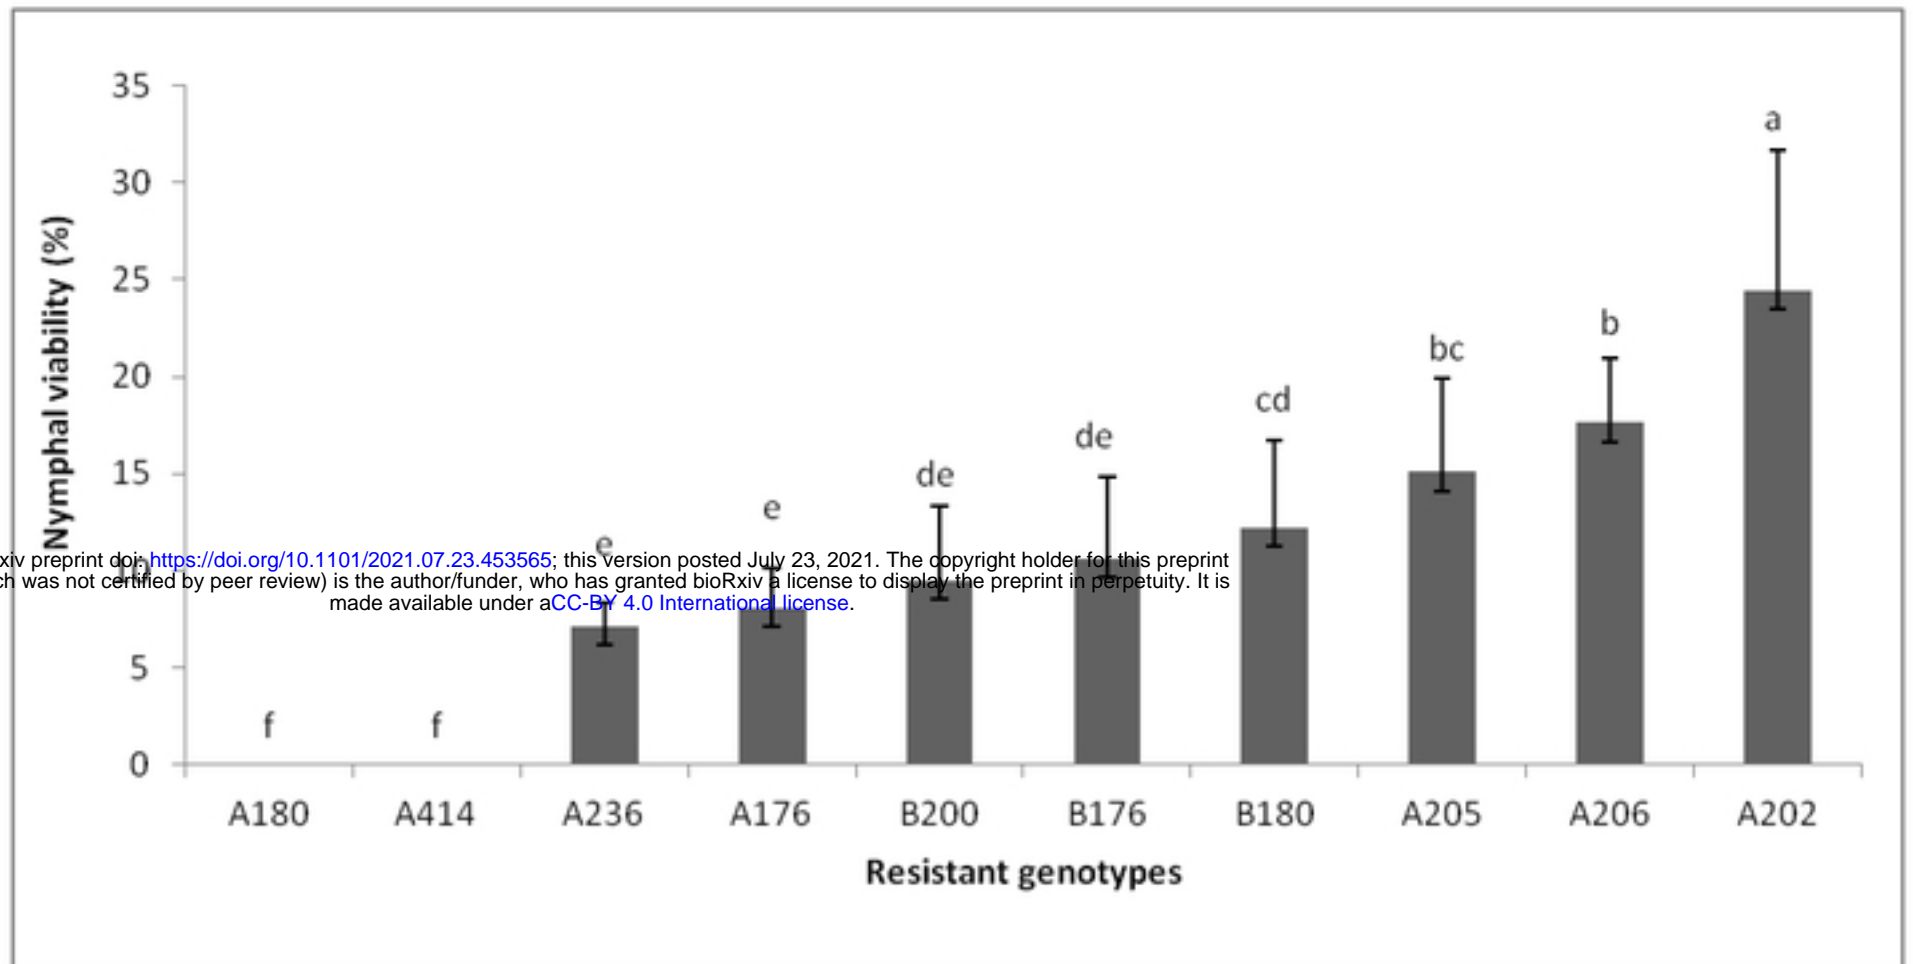

**Fig. 1**



bioRxiv preprint doi: <https://doi.org/10.1101/2021.07.23.453565>; this version posted July 23, 2021. The copyright holder for this preprint (which was not certified by peer review) is the author/funder, who has granted bioRxiv a license to display the preprint in perpetuity. It is made available under aCC-BY 4.0 International license.

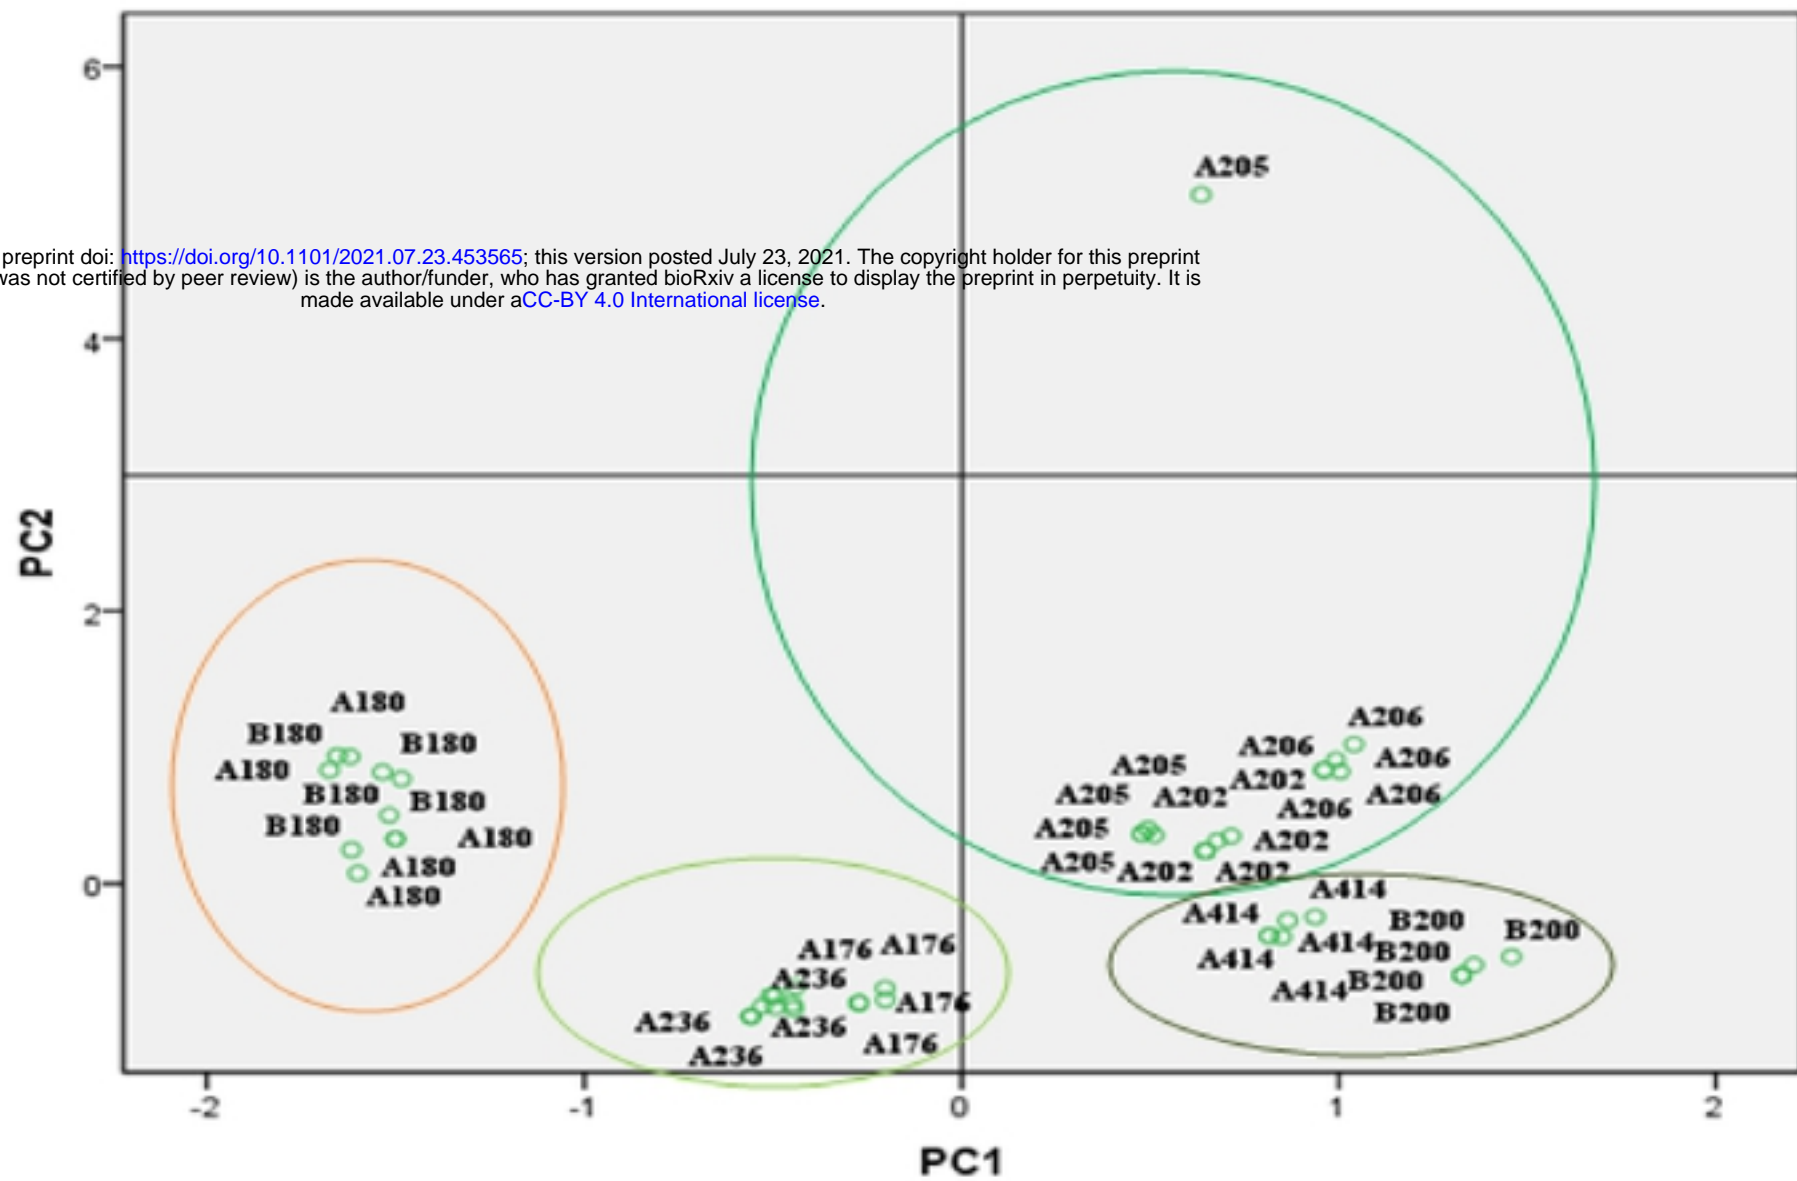

Fig. 2
